# Supplementary material for: SARS-CoV-2 genome sequencing from COVID-19 in Ecuadorian patients: a whole country analysis
Source: medRxiv preprint, doi:10.1101/2021.03.19.21253620, version 1 (2021-03-24)
Supplement: Supplemental Table 2 [file 253620_file04.pdf]

[illegible][illegible]
