# Supplementary material for: SARS-CoV-2 genome sequencing from COVID-19 in Ecuadorian patients: a whole country analysis
Source: bioRxiv or medRxiv preprint supplement (doi:10.1101/2021.03.19.21253620), 2021-03-24
Supplement: Supplementary file [file media-2.pdf]

Table1. Mutations found in four SARS CoV2 Genomes from Ecuador compared to Wuhan-Hu-1 (GenBank accession number MN908947)

| ID            | Genome Sequence | Locality                         | Clade* | Lineage** | Gen          | Mutation | Aminoacid replacement | Type          |
|---------------|-----------------|----------------------------------|--------|-----------|--------------|----------|-----------------------|---------------|
| HEE-01        | EPI_ISL_417482  | Quito – Pichincha                | 19A    | B         | nsp1/ORF1ab  | T514C    | -                     | -             |
|               |                 |                                  |        |           | S            | A25182T  | E1207V                | Transversions |
|               |                 |                                  |        |           | nsp3/ORF1ab  | C3037T   | -                     | -             |
|               |                 |                                  |        |           | nsp3/ORF1ab  | C4010T   | L431F                 | Transition    |
|               |                 |                                  |        |           | nsp12/ORF1ab | C14408T  | P323L                 | Transition    |
|               |                 |                                  |        |           | nsp14/ORF1ab | C18555T  | -                     | -             |
| HGSQ-USFQ-018 | EPI_ISL_422563  | Quito – Pichincha                | 20B    | B.1.1.119 | S            | A23403G  | D614G                 | Transition    |
|               |                 |                                  |        |           | ORF3a        | A25983G  | -                     | -             |
|               |                 |                                  |        |           | N            | G28881A  | R203K                 | Transition    |
|               |                 |                                  |        |           | N            | G28882A  | R203K                 | Transition    |
|               |                 |                                  |        |           | N            | G28883C  | G204R                 | Transversions |
|               |                 |                                  |        |           | nsp15/ORF1ab | A16962C  | -                     | -             |
|               |                 |                                  |        |           | nsp15/ORF1ab | C1997T   | -                     | -             |
|               |                 |                                  |        |           | nsp6/ORF1ab  | T11737G  | N255K                 | Transversions |
|               |                 |                                  |        |           | nsp15/ORF1ab | T20497A  | S293T                 | Transversions |
|               |                 |                                  |        |           | S            | T24418T  | A288S                 | Transversions |
|               |                 |                                  |        |           | ORF3a        | A25505C  | Q38P                  | Transversions |
|               |                 |                                  |        |           | ORF3a        | G25647T  | L85F                  | Transversions |
|               |                 |                                  |        |           | ORF3a        | T25676C  | L95S                  | Transition    |
|               |                 |                                  |        |           | ORF3a        | C25678T  | L96F                  | Transition    |
|               |                 |                                  |        |           | ORF3a        | C25692T  | -                     | -             |
|               |                 |                                  |        |           | ORF3a        | T25959G  | -                     | -             |
| HGSQ-USFQ-007 | EPI_ISL_422564  | Quito – Pichincha                | 19A    | B.1.14    | ORF3a        | C25708T  | L106F                 | Transition    |
| HGSQ-USFQ-010 | EPI_ISL_422565  | Quito – Pichincha                | 19A    | B.1.14    | ORF3a        | C25710T  | -                     | -             |
|               |                 |                                  |        |           | ORF3a        | T25711C  | Y107H                 | Transition    |
|               |                 |                                  |        |           | ORF3a        | C25728T  | -                     | -             |
|               |                 |                                  |        |           | ORF3a        | A25741G  | S117G                 | Transition    |
|               |                 |                                  |        |           | ORF3a        | A25756G  | R122E                 | Transition    |
|               |                 |                                  |        |           | ORF3a        | G25757A  | -                     | -             |
|               |                 |                                  |        |           | ORF3a        | A25764T  | -                     | -             |
|               |                 |                                  |        |           | ORF3a        | T25779G  | -                     | -             |
|               |                 |                                  |        |           | ORF3a        | G25781A  | C130*                 | Transition    |
|               |                 |                                  |        |           | ORF3a        | C25782A  | -                     | -             |
|               |                 |                                  |        |           | ORF3a        | G25879A  | V163T                 | Transition    |
|               |                 |                                  |        |           | ORF3a        | T25880C  | -                     | -             |
|               |                 |                                  |        |           | ORF3a        | C25883A  | T164N                 | Transversions |
|               |                 |                                  |        |           | ORF3a        | T25885G  | S165A                 | Transversions |
|               |                 |                                  |        |           | ORF8         | A28035G  | R49G                  | Transition    |
|               |                 |                                  |        |           | ORF8         | A28037G  | -                     | -             |
|               |                 |                                  |        |           | ORF8         | G28038T  | V49L                  | Transversions |
|               |                 |                                  |        |           | ORF8         | C28076T  | -                     | -             |
|               |                 |                                  |        |           | ORF8         | T28078C  | V62A                  | Transition    |
|               |                 |                                  |        |           | nsp3/ORF1ab  | C3037T   | -                     | -             |
|               |                 |                                  |        |           | nsp4/ORF1ab  | T9172C   | -                     | -             |
|               |                 |                                  |        |           | nsp5/ORF1a   | A10948G  | -                     | -             |
| USFQ-045      | EPI_ISL_471268  | Babahoyo – Los Rios              | 20B    | B.1.1.207 | nsp12/ORF1ab | C14408T  | P323L                 | Transition    |
|               |                 |                                  |        |           | S            | A23403G  | D614G                 | Transition    |
|               |                 |                                  |        |           | M            | G26730T  | V70F                  | Transversions |
|               |                 |                                  |        |           | N            | G28881A  | R203K                 | Transition    |
|               |                 |                                  |        |           | N            | G28882A  | R203K                 | Transition    |
|               |                 |                                  |        |           | N            | G28883C  | G204R                 | Transversions |
|               |                 |                                  |        |           | nsp3/ORF1ab  | C3037T   | -                     | -             |
|               |                 |                                  |        |           | nsp12/ORF1ab | C14408T  | P323L                 | Transition    |
|               |                 |                                  |        |           | S            | A23403G  | D614G                 | Transition    |
|               |                 |                                  |        |           | N            | G28881A  | R203K                 | Transition    |
|               |                 |                                  |        |           | N            | G28882A  | R203K                 | Transition    |
|               |                 |                                  |        |           | N            | G28883C  | G204R                 | Transversions |
|               |                 |                                  |        |           | nsp3/ORF1ab  | C3037T   | -                     | -             |
|               |                 |                                  |        |           | nsp3/ORF1ab  | C8266T   | -                     | -             |
|               |                 |                                  |        |           | nsp12/ORF1ab | C14408T  | P323L                 | Transition    |
|               |                 |                                  |        |           | nsp12/ORF1ab | C15222T  | -                     | -             |
| USFQ-147      | EPI_ISL_491937  | Calceta – Manabí                 | 20B    | B.1.1.119 | S            | A23403G  | D614G                 | Transition    |
|               |                 |                                  |        |           | N            | G28881A  | R203K                 | Transition    |
|               |                 |                                  |        |           | N            | G28882A  | R203K                 | Transition    |
|               |                 |                                  |        |           | N            | G28883C  | G204R                 | Transversions |
|               |                 |                                  |        |           | nsp3/ORF1ab  | C3037T   | -                     | -             |
|               |                 |                                  |        |           | nsp3/ ORF1a  | C4002T   | T428I                 | Transition    |
| USFQ-131      | EPI_ISL_491935  | General Villamil Playas – Guayas | 20D    | B.1.1.1   | nsp5/ORF1a   | G10097A  | G15S                  | Transition    |
| USFQ-194      | EPI_ISL_527810  | Guaranda – Bolívar               | 20D    | B.1.1.1   | nsp12/ORF1a  | C13536T  | -                     | -             |
| USFQ-195      | EPI_ISL_527811  | Guaranda – Bolívar               | 20D    | B.1.1.1   | nsp12/ORF1a  | C14408T  | P323L                 | Transition    |
| USFQ-212      | EPI_ISL_539785  | Cuenca – Azuay                   | 20D    | B.1.1.1   | S            | A23403G  | D614G                 | Transition    |
| USFQ-219      | EPI_ISL_539789  | Macacara – Loja                  | 20D    | B.1.1.1   | S            | C23731T  | -                     | -             |
| USFQ-513      | EPI_ISL_660537  | Machala – El Oro                 | 20D    | B.1.1.1   | N            | G28881A  | R203K                 | Transition    |
|               |                 |                                  |        |           | N            | G28882A  | R203K                 | Transition    |
|               |                 |                                  |        |           | N            | G28883C  | G204R                 | Transversions |
|               |                 |                                  |        |           | nsp3/ORF1ab  | C3037T   | -                     | -             |
|               |                 |                                  |        |           | nsp4/ORF1ab  | T9172C   | -                     | -             |
| USFQ-105      | EPI_ISL_486842  | Riobamba – Chimborazo            | 20B    | B.1.1.207 | nsp5/ORF1a   | A10948G  | -                     | -             |
| USFQ-108      | EPI_ISL_486843  | Riobamba – Chimborazo            | 20B    | B.1.1.207 | nsp12/ORF1ab | C14408T  | P323L                 | Transition    |
| USFQ-109      | EPI_ISL_486844  | Riobamba – Chimborazo            | 20B    | B.1.1.207 | S            | A23403G  | D614G                 | Transition    |
| USFQ-111      | EPI_ISL_486846  | Ibarra – Imbabura                | 20B    | B.1.1.207 | M            | G26730T  | V70F                  | Transversions |
| USFQ-114      | EPI_ISL_486849  | Ibarra – Imbabura                | 20B    | B.1.1.207 | N            | G28881A  | R203K                 | Transition    |
| USFQ-118      | EPI_ISL_486850  | Ibarra – Imbabura                | 20B    | B.1.1.207 | N            | G28882A  | R203K                 | Transition    |
| USFQ-119      | EPI_ISL_486851  | Urcuquí – Imbabura               | 20B    | B.1.1.207 | N            | G28883C  | G204R                 | Transversions |
|               |                 |                                  |        |           | nsp3/ORF1ab  | C3037T   | -                     | -             |
|               |                 |                                  |        |           | nsp12/ORF1ab | C14408T  | P323L                 | Transition    |
|               |                 |                                  |        |           | nsp14/ORF1ab | C19170T  | -                     | -             |
|               |                 |                                  |        |           | nsp14/ORF1ab | G19509A  | -                     | -             |
|               |                 |                                  |        |           | S            | A23403G  | D614G                 | Transition    |
|               |                 |                                  |        |           | N            | G28881A  | R203K                 | Transition    |
|               |                 |                                  |        |           | N            | G28882A  | R203K                 | Transition    |
|               |                 |                                  |        |           | N            | G28883C  | G204R                 | Transversions |
|               |                 |                                  |        |           | nsp3/ORF1ab  | C3037T   | -                     | -             |
|               |                 |                                  |        |           | nsp12/ORF1a  | C14408T  | P323L                 | Transition    |
|               |                 |                                  |        |           | nsp16/ ORF1a | C21242T  | T195I                 | Transition    |
|               |                 |                                  |        |           | S            | A23403G  | D614G                 | Transition    |
|               |                 |                                  |        |           | ORF3a        | G25947T  | Q185H                 | Transversions |
|               |                 |                                  |        |           | N            | G28881A  | R203K                 | Transition    |
|               |                 |                                  |        |           | N            | G28882A  | R203K                 | Transition    |
|               |                 |                                  |        |           | N            | G28883C  | G204R                 | Transversions |
|               |                 |                                  |        |           | nsp3/ORF1ab  | C3037T   | -                     | -             |
|               |                 |                                  |        |           | nsp3/ORF1ab  | T3788C   | -                     | -             |
|               |                 |                                  |        |           | nsp3/ ORF1a  | G5561A   | E948K                 | Transition    |
| USFQ-054      | EPI_ISL_481246  | Babahoyo – Los Rios              | 20B    | B.1.1.119 | nsp12/ORF1ab | C14408T  | P323L                 | Transition    |
| USFQ-066      | EPI_ISL_481248  | Babahoyo – Los Rios              | 20B    | B.1.1.119 | nsp16/ ORF1a | C21242T  | T195I                 | Transition    |
|               |                 |                                  |        |           | S            | A23403G  | D614G                 | Transition    |
|               |                 |                                  |        |           | N            | G28881A  | R203K                 | Transition    |
|               |                 |                                  |        |           | N            | G28882A  | R203K                 | Transition    |
|               |                 |                                  |        |           | N            | G28883C  | G204R                 | Transversions |
|               |                 |                                  |        |           | nsp2/ORF1ab  | G922A    | -                     | -             |
|               |                 |                                  |        |           | nsp3/ORF1ab  | C3037T   | -                     | -             |
|               |                 |                                  |        |           | nsp12/ORF1ab | C14408T  | P323L                 | Transition    |
|               |                 |                                  |        |           | nsp14/ORF1ab | T18436C  | F133L                 | Transition    |
|               |                 |                                  |        |           | S            | A23403G  | D614G                 | Transition    |
|               |                 |                                  |        |           | N            | G28881A  | R203K                 | Transition    |
|               |                 |                                  |        |           | N            | G28882A  | R203K                 | Transition    |
|               |                 |                                  |        |           | N            | G28883C  | G204R                 | Transversions |
|               |                 |                                  |        |           | nsp3/ORF1ab  | C3037T   | -                     | -             |
|               |                 |                                  |        |           | nsp3/ORF1ab  | C3130T   | -                     | -             |
|               |                 |                                  |        |           | nsp3/ORF1ab  | T3793C   | -                     | -             |
| USFQ-026      | EPI_ISL_481244  | Babahoyo – Los Rios              | 20A    | B.1       | nsp12/ORF1ab | C14408T  | P323L                 | Transition    |
| USFQ-113      | EPI_ISL_486848  | Ibarra – Imbabura                | 20A    | B.1       | nsp12/ORF1ab | A23403G  | D614G                 | Transition    |
|               |                 |                                  |        |           | S            | A26530G  | D3G                   | Transition    |
|               |                 |                                  |        |           | nsp3/ORF1ab  | C3037T   | -                     | -             |
|               |                 |                                  |        |           | nsp12/ORF1ab | C14408T  | P323L                 | Transition    |
|               |                 |                                  |        |           | nsp15/ORF1ab | C20148T  | D614G                 | Transition    |
|               |                 |                                  |        |           | S            | A23403G  | D614G                 | Transition    |
|               |                 |                                  |        |           | M            | A26530G  | D3G                   | Transition    |
|               |                 |                                  |        |           | N            | C28826T  | R185C                 | Transition    |
|               |                 |                                  |        |           | nsp1/ORF1a   | C1059T   | T85I                  | Transition    |
|               |                 |                                  |        |           | nsp3/ORF1ab  | C3037T   | -                     | -             |
|               |                 |                                  |        |           | nsp9/ORF1ab  | C12880T  | -                     | -             |
|               |                 |                                  |        |           | nsp12/ORF1ab | C14408T  | P323L                 | Transition    |
| USFQ-096      | EPI_ISL_477015  | Quito – Pichincha                | 20C    | B.1.371   | nsp12/ORF1ab | C14408T  | P323L                 | Transition    |

|           |                |                                          |     |           |                                                                                                                                           | S<br>ORF 3a<br>N                                                                                                                  | A23403G<br>G25563T<br>G29553A                                                      | D614G<br>Q57H | Transition<br>Transversions                                                                                  |
|-----------|----------------|------------------------------------------|-----|-----------|-------------------------------------------------------------------------------------------------------------------------------------------|-----------------------------------------------------------------------------------------------------------------------------------|------------------------------------------------------------------------------------|---------------|--------------------------------------------------------------------------------------------------------------|
| USFQ-126  | EPI_ISL_491939 | Waarani indigenous community - Orellana  | 20A | B.1       | nsp3/ORF1ab                                                                                                                               | C3037T                                                                                                                            | -                                                                                  | -             | Transition                                                                                                   |
| USFQ-127  | EPI_ISL_491940 | Waarani indigenous community - Orellana  | 20A | B.1       | nsp5/ORF1a<br>nsp12/ORF1ab<br>nsp15/ORF1ab                                                                                                | A10323G<br>C14408T<br>A20268G                                                                                                     | K90R<br>P323L                                                                      | -             | Transition                                                                                                   |
| USFQ-097  | EPI_ISL_477016 | Quito - Pichincha                        | 20A | B.1       | nsp3/ORF1ab<br>nsp3/ORF1a<br>nsp7/ORF1ab<br>nsp12/ORF1ab<br>nsp15/ORF1ab                                                                  | C3037T<br>C8025T<br>A11983G<br>C14408T<br>A20268G<br>A23403G                                                                      | A1769V<br>P323L                                                                    | -             | Transition                                                                                                   |
| USFQ-133  | EPI_ISL_491941 | alpagos Islands - Puerto Baquerizo Moren | 20A | B.1       | nsp3/ORF1ab<br>nsp9/ORF1ab<br>nsp12/ORF1ab<br>nsp15/ORF1ab                                                                                | C3037T<br>C12915T<br>C14408T<br>A20268G<br>A23403G                                                                                | -                                                                                  | P323L         | Transition                                                                                                   |
| USFQ-020  | EPI_ISL_471267 | Babahoyo - Los Rios                      | 20A | B.1.67    | nsp3/ORF1ab                                                                                                                               | C3037T                                                                                                                            | -                                                                                  | -             | -                                                                                                            |
| USFQ-004  | EPI_ISL_477014 | Quito - Pichincha                        | 20A | B.1.67    | nsp12/ORF1ab                                                                                                                              | C14408T                                                                                                                           | P323L                                                                              | -             | Transition                                                                                                   |
| USFQ-039  | EPI_ISL_481245 | Babahoyo - Los Rios                      | 20A | B.1.67    | S                                                                                                                                         | A23403G                                                                                                                           | D614G                                                                              | -             | Transition                                                                                                   |
| USFQ-110  | EPI_ISL_486845 | Cayambe - Pichincha                      | 20A | B.1.67    | M                                                                                                                                         | T26512C                                                                                                                           | -                                                                                  | -             | -                                                                                                            |
| USFQ-112  | EPI_ISL_486847 | Ibarra - Imbabura                        | 20A | B.1.67    |                                                                                                                                           |                                                                                                                                   |                                                                                    |               |                                                                                                              |
| USFQ-161  | EPI_ISL_516648 | Yantzaza - Zamora-Chinchi                | 20C | B.1.308   | nsp2/ORF1ab<br>nsp3/ORF1ab<br>nsp3/ORF1ab<br>nsp4/ORF1ab<br>nsp12/ORF1ab<br>nsp12/ORF1ab<br>nsp16/ORF1ab                                  | C1059T<br>C3037T<br>C6363T<br>C9866T<br>C14408T<br>A14747G<br>A20755C<br>A23403G                                                  | T85I<br>A1215V<br>L438F<br>P323L<br>E436G<br>S33R<br>D614G                         | -             | Transition<br>Transition<br>Transition<br>Transition<br>Transition<br>Transition<br>Transition               |
| USFQ-162  | EPI_ISL_516649 | Yantzaza - Zamora-Chinchi                | 20A | B.1.223   | nsp3/ORF1ab                                                                                                                               | C3037T                                                                                                                            | -                                                                                  | -             | Transition                                                                                                   |
| USFQ-197  | EPI_ISL_527813 | Esmeraldas - Esmeraldas                  | 20A | B.1.223   | nsp3/ORF1ab<br>nsp12/ORF1ab<br>nsp12/ORF1ab<br>nsp15/ORF1ab                                                                               | A3215G<br>C14408T<br>G15438T<br>A20268G<br>A23403G                                                                                | S166G<br>P323L<br>M666I                                                            | -             | Transition<br>Transition<br>Transition                                                                       |
| USFQ-165  | EPI_ISL_516650 | Quito-Pichincha                          | 19B | A.1       | nsp2/ORF1ab<br>nsp4/ORF1ab<br>nsp4/ORF1ab<br>nsp13/ORF1ab<br>nsp13/ORF1ab<br>nsp13/ORF1ab<br>nsp13/ORF1ab<br>nsp14/ORF1ab<br>nsp14/ORF1ab | C1457T<br>C8782T<br>T9445C<br>T17531C<br>C17747T<br>A17858G<br>C18060T<br>G18756T<br>A24694T<br>T28144C<br>T2887C                 | R218C<br>-<br>-<br>I432T<br>P504L<br>Y541C<br>-<br>-<br>L84S<br>F90L               | -             | Transition<br>Transition<br>Transition<br>Transition<br>Transition<br>Transition<br>Transition               |
| USFQ-167  | EPI_ISL_516651 | Quevedo - Los Rios                       | 20A | B.1.223   | nsp3/ORF1ab                                                                                                                               | C3037T                                                                                                                            | -                                                                                  | -             | Transition                                                                                                   |
| USFQ-171  | EPI_ISL_516652 | Coca - Orellana                          | 20A | B.1.223   | nsp3/ORF1ab                                                                                                                               | A3215G                                                                                                                            | S166G                                                                              | -             | Transition                                                                                                   |
| USFQ-186  | EPI_ISL_525436 | Otavalo - Imbabura                       | 20A | B.1.223   | nsp12/ORF1ab                                                                                                                              | C14408T                                                                                                                           | P323L                                                                              | -             | Transition                                                                                                   |
| USFQ-MC01 | EPI_ISL_525438 | Quito - Pichincha                        | 20A | B.1.223   | nsp12/ORF1ab                                                                                                                              | G15438T                                                                                                                           | M666I                                                                              | -             | Transition                                                                                                   |
| USFQ-216  | EPI_ISL_539788 | Cuenca - Azuay                           | 20A | B.1.223   | nsp15/ORF1ab<br>S                                                                                                                         | A20268G<br>A23403G                                                                                                                | D614G                                                                              | -             | Transition                                                                                                   |
| USFQ-163  | EPI_ISL_525430 | Quito - Pichincha                        | 20A | B.1.9     | nsp2/ORF1ab<br>nsp3/ORF1ab<br>nsp3/ORF1ab<br>nsp12/ORF1ab<br>nsp13/ORF1ab<br>nsp14/ORF1ab                                                 | C2113T<br>C3037T<br>C7765T<br>C14408T<br>C17690T<br>C18877T<br>A23403G<br>G25563T                                                 | -<br>-<br>-<br>P323L<br>S485L<br>-<br>D614G<br>Q57H                                | -             | Transition<br>Transition<br>Transition<br>Transition<br>Transition                                           |
| USFQ-177  | EPI_ISL_525431 | Zamora - Zamora-Chinchi                  | 20A | B.1       | nsp3/ORF1ab                                                                                                                               | C3037T                                                                                                                            | -                                                                                  | -             | Transition                                                                                                   |
| USFQ-184  | EPI_ISL_525435 | Orellana - Orellana                      | 20A | B.1       | nsp3/ORF1ab                                                                                                                               | C13130T                                                                                                                           | -                                                                                  | -             | Transition                                                                                                   |
| USFQ-188  | EPI_ISL_525437 | Otavalo - Imbabura                       | 20A | B.1       | nsp3/ORF1ab<br>nsp12/ORF1ab                                                                                                               | G3403T<br>C14408T<br>A23403G<br>S                                                                                                 | -<br>P323L<br>D614G<br>D3G                                                         | -             | Transition<br>Transition<br>Transition                                                                       |
| USFQ-193  | EPI_ISL_527809 | Guaranda - Bolivar                       | 20B | B.1.1.119 | nsp3/ORF1ab                                                                                                                               | C3037T                                                                                                                            | -                                                                                  | -             | Transition                                                                                                   |
| USFQ-201  | EPI_ISL_527815 | Esmeraldas - Esmeraldas                  | 20B | B.1.1.119 | nsp12/ORF1ab                                                                                                                              | T13552C                                                                                                                           | Y38H                                                                               | -             | Transition                                                                                                   |
| USFQ-203  | EPI_ISL_527816 | Esmeraldas - Esmeraldas                  | 20B | B.1.1.119 | nsp12/ORF1ab                                                                                                                              | C14408T                                                                                                                           | P323L                                                                              | -             | Transition                                                                                                   |
| USFQ-207  | EPI_ISL_527819 | Guayaquil - Guayas                       | 20B | B.1.1.119 | nsp16/ORF1ab                                                                                                                              | C21242T                                                                                                                           | T195I                                                                              | -             | Transition                                                                                                   |
| USFQ-249  | EPI_ISL_697787 | Azogues - Cañar                          | 20B | B.1.1.119 | S                                                                                                                                         | A23403G                                                                                                                           | D614G                                                                              | -             | Transition                                                                                                   |
| USFQ-528  | EPI_ISL_697797 | Guayaquil - Guayas                       | 20B | B.1.1.119 | N                                                                                                                                         | G28881A                                                                                                                           | R203K                                                                              | -             | Transition                                                                                                   |
| USFQ-228  | EPI_ISL_660529 | Ambato - Tungurahua                      | 20B | B.1.1.119 | N                                                                                                                                         | G28882A<br>G28883C                                                                                                                | R203K<br>G204R                                                                     | -             | Transition<br>Transition                                                                                     |
| USFQ-196  | EPI_ISL_527812 | Esmeraldas - Esmeraldas                  | 20A | B.1       | nsp3/ORF1ab                                                                                                                               | C3037T                                                                                                                            | -                                                                                  | -             | Transition                                                                                                   |
| USFQ-199  | EPI_ISL_527814 | Esmeraldas - Esmeraldas                  | 20A | B.1       | nsp3/ORF1ab                                                                                                                               | C3130T                                                                                                                            | -                                                                                  | -             | Transition                                                                                                   |
| USFQ-204  | EPI_ISL_527817 | Esmeraldas - Esmeraldas                  | 20A | B.1       | nsp3/ORF1ab                                                                                                                               | T3793C                                                                                                                            | -                                                                                  | -             | Transition                                                                                                   |
| USFQ-214  | EPI_ISL_539787 | Cuenca - Azuay                           | 20A | B.1       | nsp12/ORF1ab                                                                                                                              | C14408T                                                                                                                           | P323L                                                                              | -             | Transition                                                                                                   |
| USFQ-222  | EPI_ISL_539791 | Macara - Loja                            | 20A | B.1       | S                                                                                                                                         | A23403G                                                                                                                           | D614G                                                                              | -             | Transition                                                                                                   |
| USFQ-224  | EPI_ISL_539792 | Catamayo - Loja                          | 20A | B.1       | M                                                                                                                                         | A26530G                                                                                                                           | D3G                                                                                | -             | Transition                                                                                                   |
| USFQ-402  | EPI_ISL_660532 | Puyo - Pastaza                           | 20A | B.1       |                                                                                                                                           |                                                                                                                                   |                                                                                    |               |                                                                                                              |
| USFQ-178  | EPI_ISL_525432 | El Pangul - Zamora-Chinchi               | 20C | B.1       | nsp2/ORF1ab                                                                                                                               | C1059T<br>C3037T                                                                                                                  | T85I                                                                               | -             | Transition                                                                                                   |
| USFQ-182  | EPI_ISL_525433 | Quevedo - Los Rios                       | 20C | B.1       | nsp3/ORF1ab<br>nsp12/ORF1ab<br>nsp12/ORF1ab<br>nsp13/ORF1ab<br>nsp16/ORF1ab                                                               | C3037T<br>C14408T<br>A14747G<br>C16658T<br>A20755C<br>A23403G<br>G25563T                                                          | P323L<br>E436G<br>T141I<br>S33R<br>D614G<br>Q57H                                   | -             | Transition<br>Transition<br>Transition<br>Transition<br>Transition                                           |
| USFQ-183  | EPI_ISL_525434 | Quevedo - Los Rios                       | 20D | B.1.1.1   | nsp3/ORF1ab<br>nsp3/ORF1ab<br>nsp3/ORF1ab<br>nsp5/ORF1ab<br>nsp12/ORF1ab<br>nsp12/ORF1ab                                                  | C3037T<br>C4002T<br>T4092C<br>G10097A<br>C13538T<br>C14408T<br>A23403G<br>S<br>C23731T<br>N<br>G28881A<br>N<br>G28882A<br>G28883C | T428I<br>I458T<br>G15S<br>-<br>P323L<br>D614G<br>-<br>-<br>R203K<br>R203K<br>G204R | -             | Transition<br>Transition<br>Transition<br>Transition<br>Transition<br>Transition<br>Transition<br>Transition |
| USFQ-206  | EPI_ISL_527818 | Guayaquil - Guayas                       | 20B | B.1.1.119 | nsp3/ORF1ab<br>nsp3/ORF1ab<br>nsp7/ORF1ab<br>nsp12/ORF1ab<br>nsp12/ORF1ab<br>nsp16/ORF1ab                                                 | C3037T<br>C3040T<br>A11983G<br>T13552C<br>C14408T<br>C21242T<br>A23403G<br>N<br>G28881A<br>N<br>G28882A<br>G28883C                | -<br>-<br>Y38H<br>P323L<br>T195I<br>D614G<br>R203K<br>R203K<br>G204R               | -             | Transition<br>Transition<br>Transition<br>Transition<br>Transition<br>Transition                             |
| USFQ-208  | EPI_ISL_539783 | Tena - Napo                              | 20B | B.1.1.119 | nsp3/ORF1ab                                                                                                                               | C3037T                                                                                                                            | -                                                                                  | -             | Transition                                                                                                   |
| USFQ-527  | EPI_ISL_697796 | Tena - Napo                              | 20B | B.1.1.119 | nsp12/ORF1ab<br>nsp12/ORF1ab<br>S<br>ORF 3a<br>N<br>N                                                                                     | T14079C<br>C14408T<br>A23403G<br>G25690T<br>G28881A<br>G28882A<br>G28883C                                                         | P323L<br>D614G<br>G100C<br>R203K<br>R203K<br>G204R                                 | -             | Transition<br>Transition<br>Transition<br>Transition<br>Transition<br>Transition                             |
| USFQ-209  | EPI_ISL_539784 | Tena - Napo                              | 20A | B.1       | nsp3/ORF1ab                                                                                                                               | C3037T                                                                                                                            | -                                                                                  | -             | Transition                                                                                                   |
| USFQ-213  | EPI_ISL_539786 | Cuenca - Azuay                           | 20A | B.1       | nsp5/ORF1ab                                                                                                                               | A10323G                                                                                                                           | K90R                                                                               | -             | Transition                                                                                                   |
| USFQ-220  | EPI_ISL_539790 | Macara - Loja                            | 20A | B.1       | nsp12/ORF1ab<br>nsp15/ORF1ab                                                                                                              | C14408T<br>A20268G<br>A23403G                                                                                                     | P323L<br>D614G                                                                     | -             | Transition<br>Transition                                                                                     |
| USFQ-226  | EPI_ISL_539793 | Catamayo - Loja                          | 20B | B.1.1.119 | nsp2/ORF1ab                                                                                                                               | G522A                                                                                                                             | -                                                                                  | -             | Transition                                                                                                   |
| USFQ-253  | EPI_ISL_574431 | Babahoyo - Los Rios                      | 20B | B.1.1.119 | nsp3/ORF1ab<br>nsp12/ORF1ab<br>nsp14/ORF1ab<br>nsp16/ORF1ab                                                                               | C3037T<br>C14408T<br>T18436C<br>C21242T<br>S<br>N<br>G28881A<br>N<br>G28882A<br>G28883C                                           | -<br>P323L<br>F133L<br>T195I<br>D614G<br>R203K<br>R203K<br>G204R                   | -             | Transition<br>Transition<br>Transition<br>Transition<br>Transition<br>Transition<br>Transition               |
| USFQ-173  | EPI_ISL_697783 | Ibarra-Imbabura                          | 20B | B.1.1.119 | nsp1/ORF1ab                                                                                                                               | C292T                                                                                                                             | -                                                                                  | -             | Transition                                                                                                   |
| USFQ-346  | EPI_ISL_697790 | Otavalo - Imbabura                       | 20B | B.1.1.119 | nsp3/ORF1ab                                                                                                                               | C3037T                                                                                                                            | -                                                                                  | -             | Transition                                                                                                   |

|                                  |                                                    |                                                                             |                   |                                     |                                                                                                                                                                                                                                                         |                                                                                                                                                                                                                                              |                                                                                                                                                                  |                                                                                                                                                                                                                                                                                                                  |
|----------------------------------|----------------------------------------------------|-----------------------------------------------------------------------------|-------------------|-------------------------------------|---------------------------------------------------------------------------------------------------------------------------------------------------------------------------------------------------------------------------------------------------------|----------------------------------------------------------------------------------------------------------------------------------------------------------------------------------------------------------------------------------------------|------------------------------------------------------------------------------------------------------------------------------------------------------------------|------------------------------------------------------------------------------------------------------------------------------------------------------------------------------------------------------------------------------------------------------------------------------------------------------------------|
| USFQ-405                         | EPI_ISL_697792                                     | San Pablo - Imbabura                                                        | 20B               | B.1.1.119                           | nsp3/ORF1ab<br>nsp3/ORF1ab<br>nsp12/ORF1ab<br>nsp12/ORF1ab<br>nsp13/ORF1ab<br>nsp14/ORF1ab<br>S<br>ORF8<br>N<br>N<br>N                                                                                                                                  | G4319A<br>C5842T<br>T13935C<br>C14408T<br>C16750T<br>G19509A<br>A23403G<br>C24034T<br>T28009C<br>G28881A<br>G28882A<br>G28883C                                                                                                               | A534T<br>-<br>-<br>P323L<br>P172S<br>D614G<br>-<br>I39T<br>R203K<br>R203K<br>G204R                                                                               | Transition<br>-<br>-<br>Transition<br>Transition<br>Transition<br>-<br>Transition<br>Transition<br>Transition<br>Transition                                                                                                                                                                                      |
| USFQ-185<br>USFQ-189             | EPI_ISL_697784<br>EPI_ISL_697786                   | Otavalo - Imbabura<br>Otavalo - Imbabura                                    | 20D<br>20D        | B.1.1.1<br>B.1.1.1                  | nsp3/ORF1ab<br>nsp3/ORF1ab<br>nsp3/ORF1ab<br>nsp3/ORF1ab<br>nsp3/ORF1ab<br>nsp5/ORF1ab<br>nsp5/ORF1ab<br>nsp6/ORF1ab<br>nsp6/ORF1ab<br>nsp12/ORF1ab<br>nsp12/ORF1ab<br>nsp15/ORF1ab<br>S<br>S<br>N<br>N<br>N                                            | C3037T<br>A3237G<br>C4002T<br>C4878T<br>C5515T<br>C10078T<br>G10097A<br>C11758T<br>C11812T<br>C13536T<br>C14408T<br>G20434T<br>A23403G<br>C23731T<br>G28881A<br>G28882A<br>G28883C                                                           | Q173R<br>T428I<br>T720I<br>-<br>-<br>-<br>G15S<br>-<br>-<br>-<br>P323L<br>D272Y<br>D614G<br>-<br>-<br>R203K<br>R203K<br>G204R                                    | Transition<br>Transition<br>Transition<br>-<br>-<br>-<br>Transition<br>-<br>-<br>Transition<br>Transition<br>Transition<br>Transition<br>Transition<br>Transition<br>Transition<br>Transition                                                                                                                    |
| USFQ-344                         | EPI_ISL_697789                                     | Otavalo - Imbabura                                                          | 20A               | B.1.6                               | nsp3/ORF1ab<br>nsp3/ORF1ab<br>nsp3/ORF1ab<br>nsp8/ORF1ab<br>nsp12/ORF1ab<br>nsp12/ORF1ab<br>nsp12/ORF1ab<br>S<br>S<br>ORF3a<br>ORF7a<br>N<br>N<br>N                                                                                                     | C3037T<br>C5974T<br>C8394T<br>C12469T<br>C14408T<br>C15277T<br>C15324T<br>A23403G<br>A2653G<br>C3037T<br>C5986T<br>T9952C<br>A11983G<br>T14103C<br>C14408T<br>A19812C<br>C21614T<br>S<br>A23403G<br>A25122G<br>ORF3a<br>ORF7a<br>N<br>N<br>N | -<br>-<br>A1892V<br>-<br>P323L<br>H613Y<br>-<br>D614G<br>-<br>-<br>-<br>-<br>P323L<br>K64N<br>L18F<br>D614G<br>N1187S<br>K67N<br>T28I<br>R203K<br>R203K<br>G204R | -<br>-<br>Transition<br>Transition<br>Transition<br>Transition<br>Transition<br>Transition<br>Transition<br>Transition<br>Transition<br>Transition<br>Transition<br>Transition<br>Transition<br>Transition<br>Transition<br>Transition<br>Transition<br>Transition                                               |
| USFQ-381                         | EPI_ISL_697791                                     | Otavalo - Imbabura                                                          | 20B               | B.1.1.119                           | nsp2/ORF1ab<br>nsp3/ORF1ab<br>nsp3/ORF1ab<br>nsp4/ORF1ab<br>nsp7/ORF1ab<br>nsp12/ORF1ab<br>nsp12/ORF1ab<br>nsp12/ORF1ab<br>S<br>S<br>ORF3a<br>ORF7a<br>N<br>N<br>N                                                                                      | A2653G<br>C3037T<br>C5986T<br>T9952C<br>A11983G<br>T14103C<br>C14408T<br>A19812C<br>C21614T<br>S<br>A23403G<br>A25122G<br>ORF3a<br>ORF7a<br>N<br>N<br>N                                                                                      | -<br>-<br>-<br>-<br>-<br>-<br>P323L<br>K64N<br>L18F<br>D614G<br>N1187S<br>K67N<br>T28I<br>R203K<br>R203K<br>G204R                                                | -<br>-<br>-<br>-<br>-<br>-<br>Transition<br>Transition<br>Transition<br>Transition<br>Transition<br>Transition<br>Transition<br>Transition<br>Transition<br>Transition<br>Transition<br>Transition<br>Transition<br>Transition<br>Transition<br>Transition<br>Transition                                         |
| USFQ-433                         | EPI_ISL_697793                                     | Otavalo - Imbabura                                                          | 20B               | B.1.1.119                           | nsp2/ORF1a<br>nsp3/ORF1ab<br>nsp3/ORF1ab<br>nsp3/ORF1ab<br>nsp4/ORF1ab<br>nsp12/ORF1ab<br>nsp13/ORF1ab<br>nsp14/ORF1ab<br>nsp16/ORF1ab<br>S<br>A23403G<br>N<br>N<br>N                                                                                   | G922A<br>C3037T<br>A5209C<br>A6613G<br>G9928T<br>C14408T<br>T17475C<br>T18436C<br>C21242T<br>A23403G<br>G28881A<br>G28882A<br>G28883C                                                                                                        | -<br>-<br>-<br>-<br>M458I<br>P323L<br>-<br>F133L<br>T195I<br>D614G<br>R203K<br>R203K<br>G204R                                                                    | -<br>-<br>-<br>-<br>Transition<br>Transition<br>Transition<br>Transition<br>Transition<br>Transition<br>Transition<br>Transition<br>Transition<br>Transition<br>Transition<br>Transition<br>Transition                                                                                                           |
| USFQ-523                         | EPI_ISL_697794                                     | Morona - Morona Santiago                                                    | 20D               | B.1.1.1                             | nsp3/ORF1ab<br>nsp3/ORF1ab<br>nsp5/ORF1ab<br>nsp5/ORF1ab<br>nsp12/ORF1ab<br>nsp12/ORF1ab<br>S<br>S<br>N<br>N<br>N                                                                                                                                       | C3037T<br>C4002T<br>G10097A<br>T10459C<br>C13536T<br>C14408T<br>A23403G<br>C23731T<br>G28881A<br>G28882A<br>G28883C                                                                                                                          | T428I<br>G15S<br>-<br>-<br>-<br>P323L<br>D614G<br>-<br>-<br>R203K<br>R203K<br>G204R                                                                              | Transition<br>Transition<br>Transition<br>Transition<br>Transition<br>Transition<br>Transition<br>Transition<br>Transition<br>Transition<br>Transition<br>Transition                                                                                                                                             |
| USFQ-524                         | EPI_ISL_697795                                     | Morona - Morona Santiago                                                    | 20B               | B.1.1.119                           | nsp2/ORF1a<br>nsp3/ORF1ab<br>nsp5/ORF1ab<br>nsp8/ORF1ab<br>nsp12/ORF1ab<br>nsp12/ORF1ab<br>nsp13/ORF1ab<br>nsp14/ORF1ab<br>nsp16/ORF1ab<br>S<br>A23403G<br>N<br>N<br>N                                                                                  | G922A<br>C3037T<br>T10480C<br>A12358T<br>G13812T<br>C14408T<br>C15352T<br>C18032T<br>T18436C<br>C21242T<br>A23403G<br>G28881A<br>G28882A<br>G28883C                                                                                          | -<br>-<br>-<br>-<br>M124I<br>P323L<br>L638F<br>T599I<br>F133L<br>T195I<br>D614G<br>R203K<br>R203K<br>G204R                                                       | -<br>-<br>-<br>-<br>Transition<br>Transition<br>Transition<br>Transition<br>Transition<br>Transition<br>Transition<br>Transition<br>Transition<br>Transition<br>Transition<br>Transition<br>Transition                                                                                                           |
| USFQ-1188<br>USFQ-322            | EPI_ISL_697785<br>EPI_ISL_697788                   | Otavalo - Imbabura<br>Otavalo - Imbabura                                    | 20B<br>20B        | B.1.1.119<br>B.1.1.119              | nsp3/ORF1ab<br>nsp3/ORF1ab<br>nsp12/ORF1ab<br>nsp16/ORF1ab<br>S<br>N<br>N<br>N                                                                                                                                                                          | C3037T<br>C4276T<br>C14408T<br>C21242T<br>A23403G<br>G28881A<br>G28882A<br>G28883C                                                                                                                                                           | -<br>-<br>P323L<br>T195I<br>D614G<br>R203K<br>R203K<br>G204R                                                                                                     | -<br>-<br>Transition<br>Transition<br>Transition<br>Transition<br>Transition<br>Transition<br>Transition<br>Transition                                                                                                                                                                                           |
| USFQ-531<br>USFQ-533<br>USFQ-539 | EPI_ISL_697798<br>EPI_ISL_697799<br>EPI_ISL_697800 | Sucumbios<br>Sucumbios<br>Santa Elena                                       | 20A<br>20A<br>20A | B.1<br>B.1<br>B.1                   | nsp3/ORF1ab<br>nsp3/ORF1ab<br>nsp12/ORF1ab<br>nsp13/ORF1ab<br>S<br>M                                                                                                                                                                                    | C3037T<br>T3753C<br>C14408T<br>C18032T<br>A23403G<br>A26530G                                                                                                                                                                                 | -<br>-<br>P323L<br>T599I<br>D614G<br>D3G                                                                                                                         | -<br>-<br>Transition<br>Transition<br>Transition<br>Transition                                                                                                                                                                                                                                                   |
| USFQ-553<br>USFQ-555<br>USFQ-558 | EPI_ISL_728202<br>EPI_ISL_728203<br>EPI_ISL_728205 | Santo Domingo - Santo Domingo<br>Santo Domingo - Santo Domingo<br>Sucumbios | 20B<br>20B<br>20B | B.1.1.159<br>B.1.1.159<br>B.1.1.159 | nsp2/ORF1ab<br>nsp3/ORF1ab<br>nsp3/ORF1ab<br>nsp5/ORF1ab<br>nsp6/ORF1ab<br>nsp12/ORF1ab<br>nsp14/ORF1ab<br>nsp16/ORF1ab<br>S<br>N<br>N<br>N                                                                                                             | C1191T<br>C3037T<br>C7113T<br>G10360A<br>G11540T<br>C14408T<br>C18131T<br>C21538T<br>A23403G<br>C28290T<br>G28881A<br>G28882A<br>G28883C                                                                                                     | P129L<br>-<br>T1465I<br>-<br>V190F<br>P323L<br>T31I<br>V294F<br>D614G<br>P6L<br>R203K<br>R203K<br>G204R                                                          | Transition<br>-<br>Transition<br>-<br>Transition<br>Transition<br>Transition<br>Transition<br>Transition<br>Transition<br>Transition<br>Transition<br>Transition<br>Transition                                                                                                                                   |
| USFQ-556                         | EPI_ISL_728204                                     | Santo Domingo - Santo Domingo                                               | 19B               | A                                   | nsp1/ORF1ab<br>nsp1/ORF1ab<br>nsp2/ORF1ab<br>nsp3/ORF1ab<br>nsp3/ORF1ab<br>nsp3/ORF1ab<br>nsp4/ORF1ab<br>nsp4/ORF1ab<br>nsp6/ORF1ab<br>nsp12/ORF1ab<br>nsp12/ORF1ab<br>nsp13/ORF1ab<br>nsp14/ORF1ab<br>nsp14/ORF1ab<br>S<br>S<br>S<br>ORF8<br>ORF8<br>N | C276T<br>T490A<br>C1567T<br>C3165T<br>C4543T<br>A5234G<br>C8782T<br>T9477A<br>C10029T<br>C11005A<br>C14805T<br>C15960T<br>C16466T<br>C18115T<br>T18417C<br>T18736C<br>A22525G<br>C24034T<br>S<br>S<br>ORF8<br>ORF8<br>N                      | L4F<br>D75E<br>-<br>A149V<br>K839E<br>-<br>F308Y<br>T492I<br>H11Q<br>-<br>-<br>P77L<br>H26Y<br>-<br>F233L<br>-<br>-<br>-<br>-<br>V62L<br>L84S<br>-               | Transition<br>Transition<br>Transition<br>Transition<br>Transition<br>Transition<br>Transition<br>Transition<br>Transition<br>Transition<br>Transition<br>Transition<br>Transition<br>Transition<br>Transition<br>Transition<br>Transition<br>Transition<br>Transition<br>Transition<br>Transition<br>Transition |
